# Supplementary material
Source: Springer Nature journal article supplement (https://www.springermedizin.de/resource/supplementary/13063_2013_2082_MOESM2_ESM.pdf/9621338)

# T3 v. T1

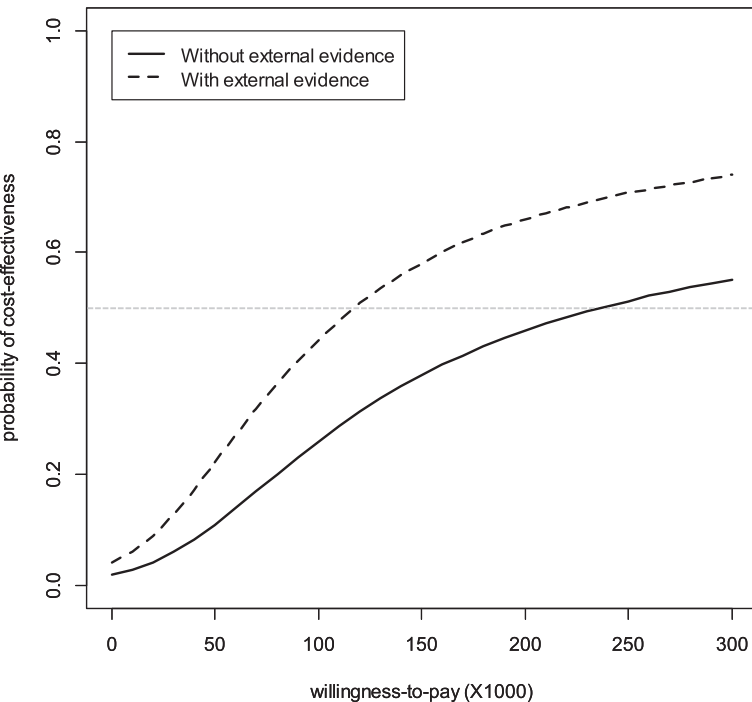

Supplement: MOESM2 [file 9621338]
